# Supplementary material
Source: ML conference proceedings conference paper supplement (https://openreview.net/forum?id=DBiQQYWykyy)
Supplement: supplementary_material [file attachment]

# Environment Predictive Coding for Visual Navigation

Anonymous ICLR 2022 submission

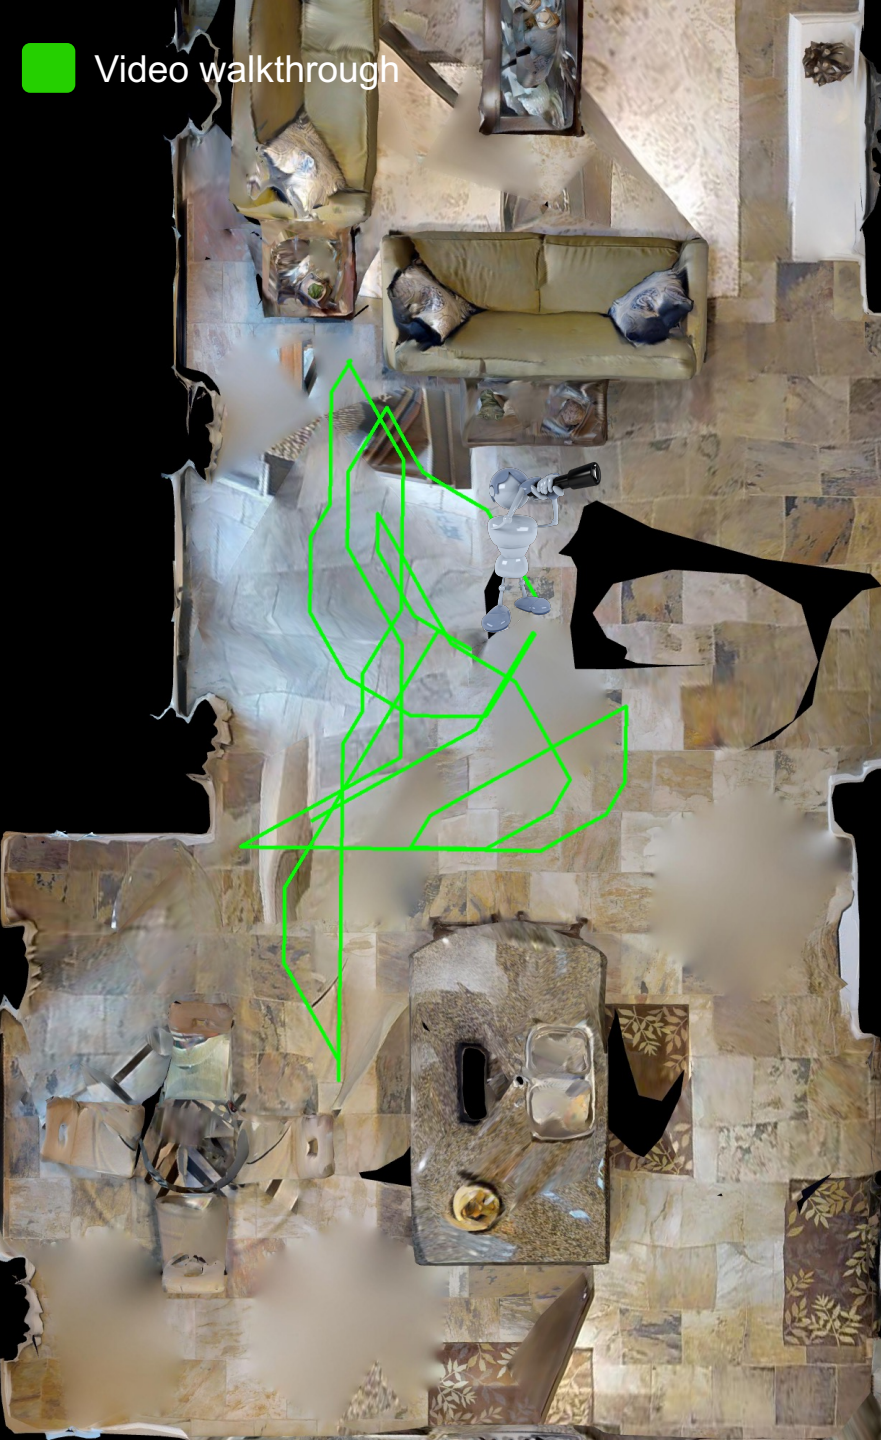

# Environment Predictive Coding (EPC)

Video walkthrough

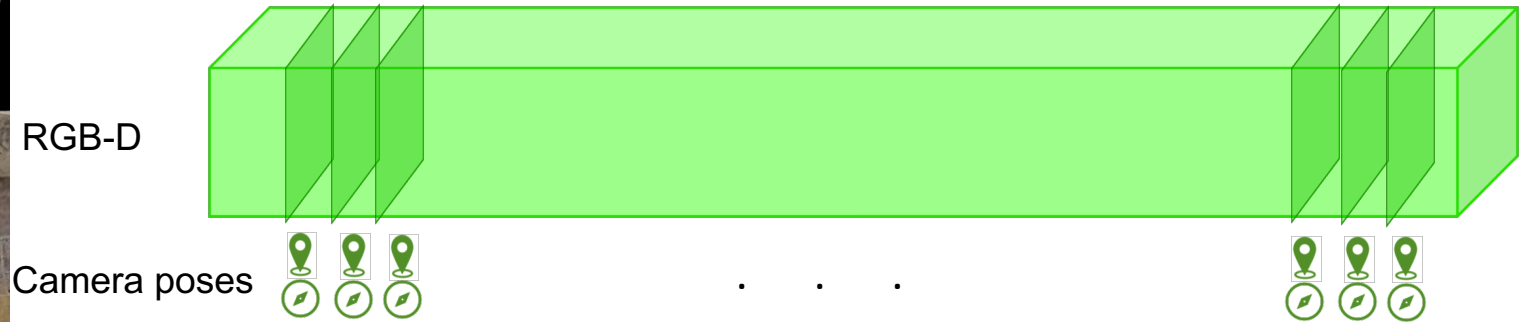

We are given *video walkthroughs* collected by another agent navigating in various indoor environments.

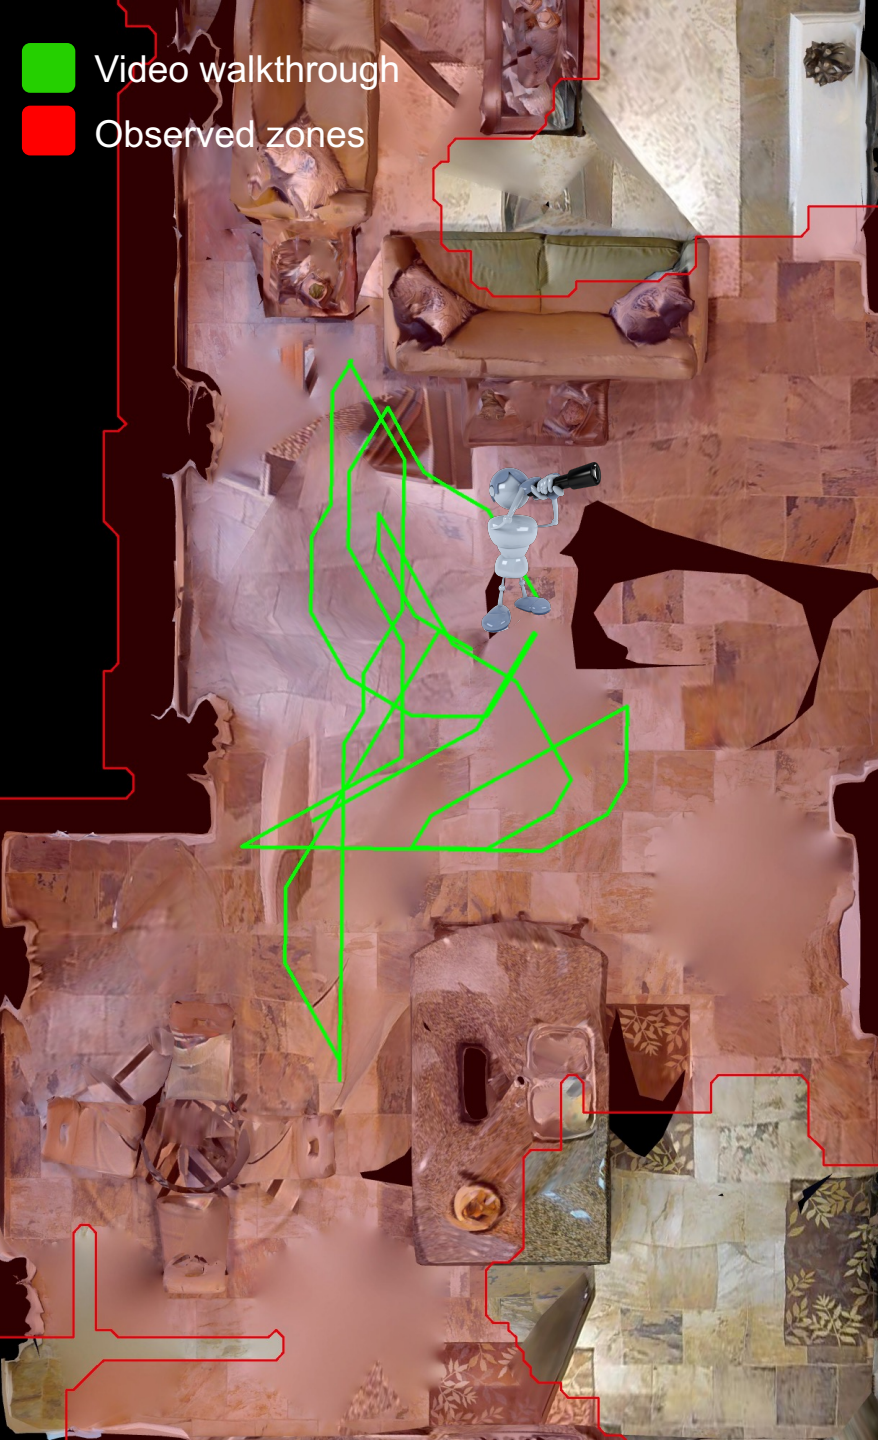

# Environment Predictive Coding (EPC)

Video walkthrough

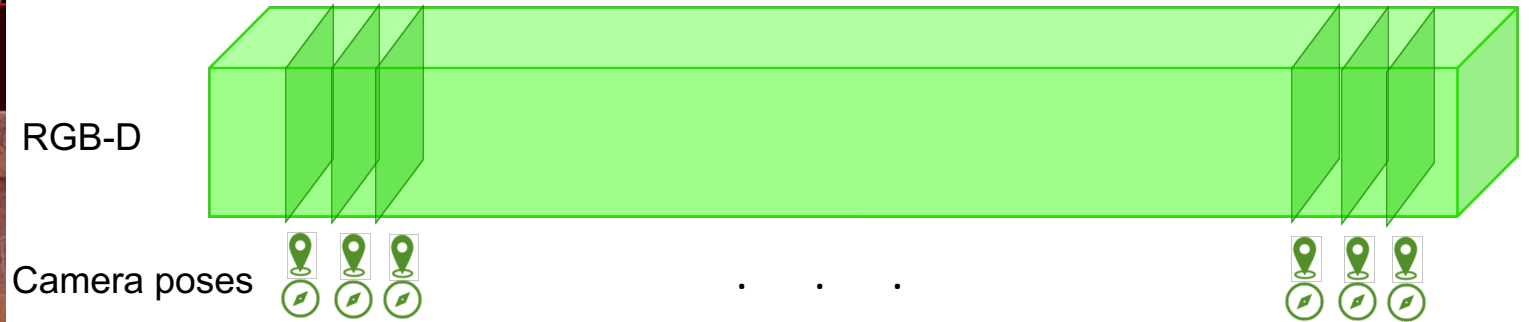

The *observed portions* of the environment are shown in red.





# Environment Predictive Coding (EPC)

Video walkthrough

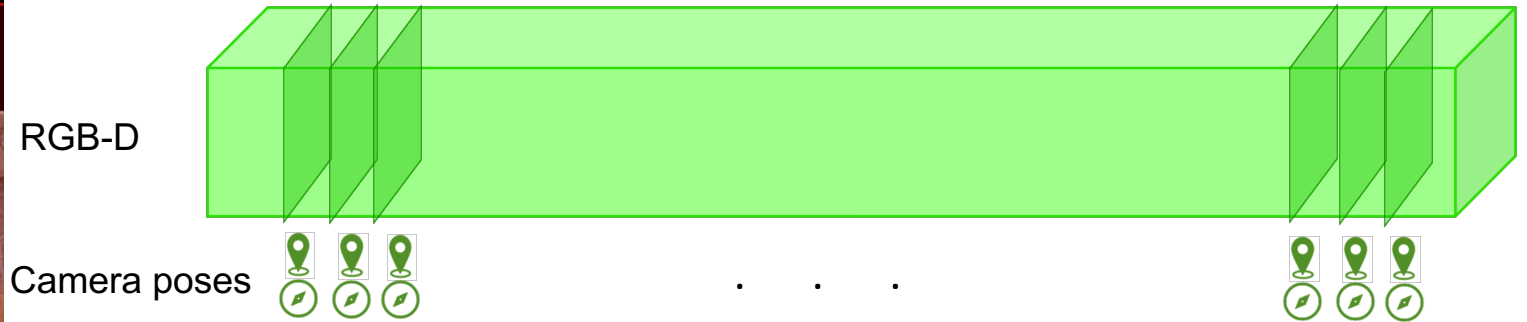

- We propose the *masked-zone prediction* task for self-supervised learning.
- The goal is to learn environment-level representations of *egocentric observation sequences*.



## Masked-zone prediction - Step 1: zone creation

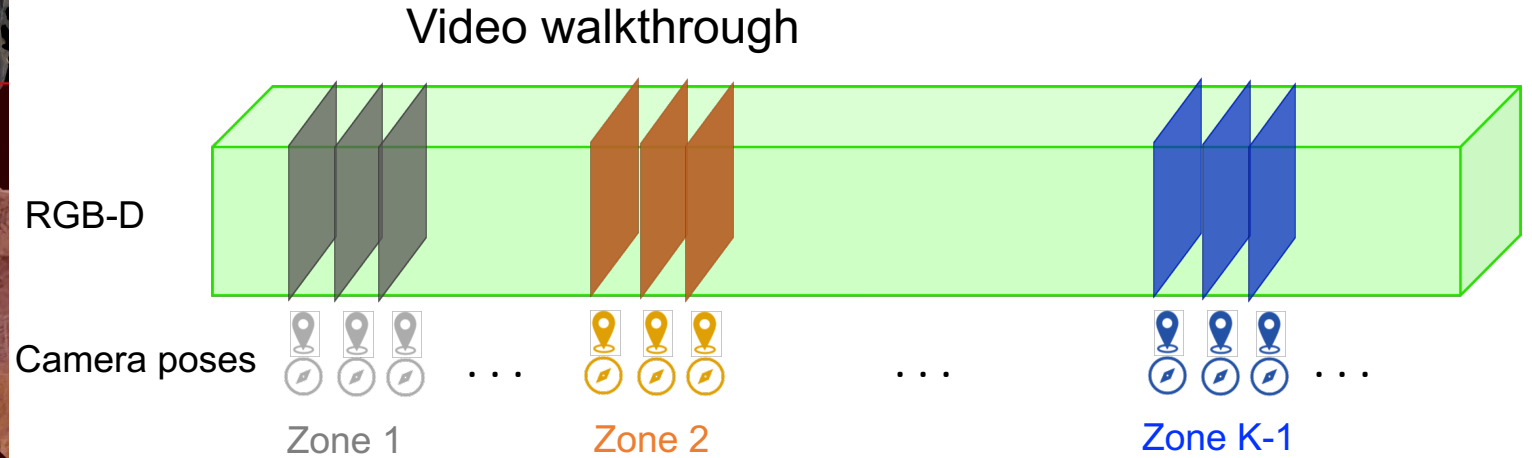

- First, we segment the walkthrough into  $K$  disjoint frame sets.
- Each frame set is called a *zone*.
- Each zone contains a temporally contiguous set of  $N$  frames in the video.



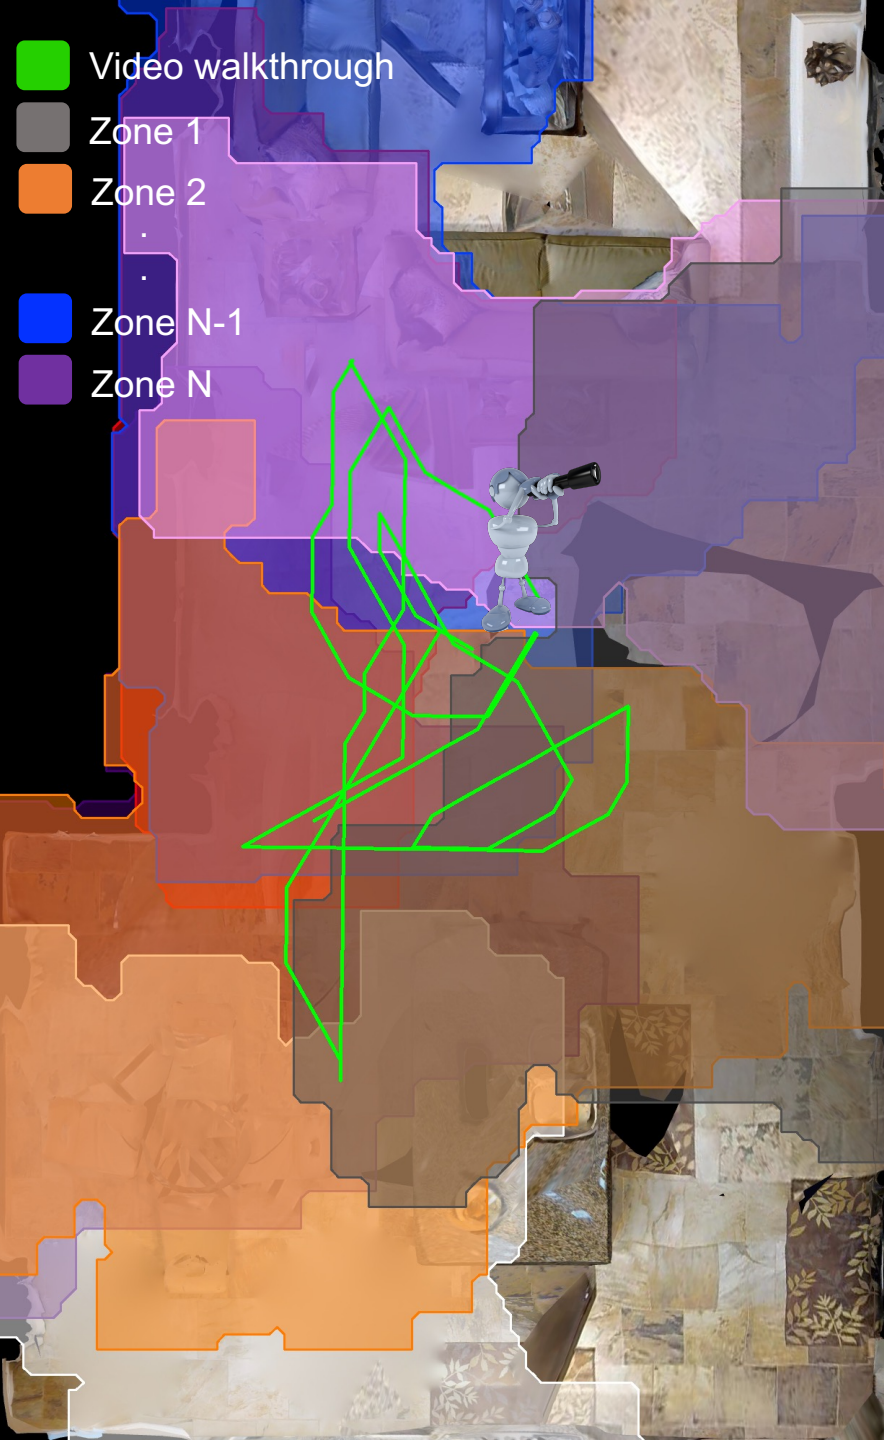

## Masked-zone prediction - Step 1: zone creation

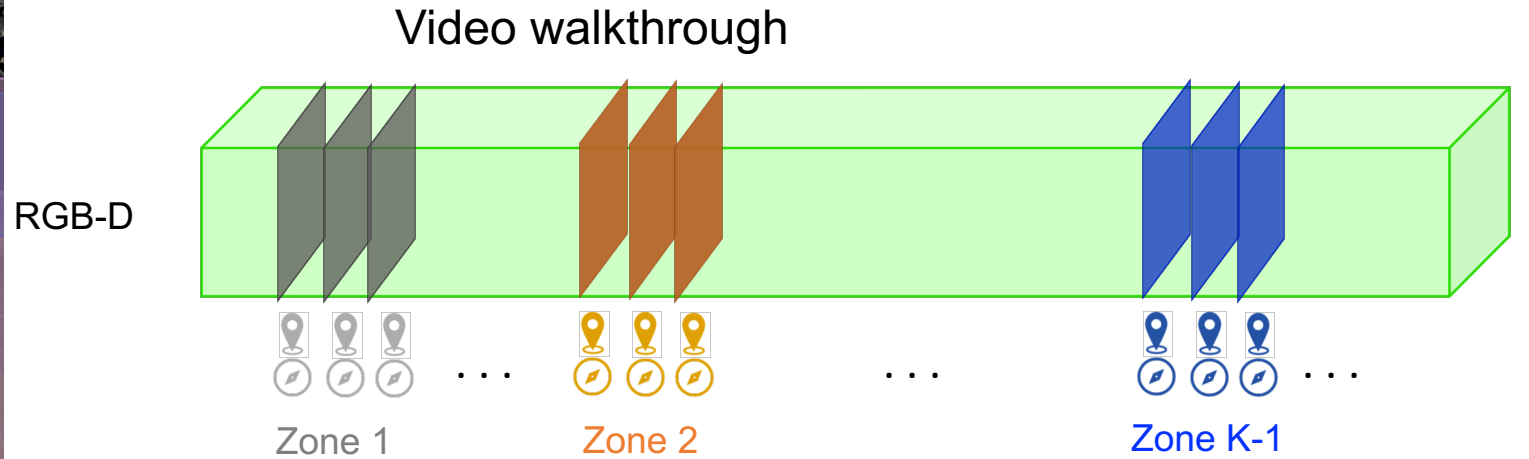

- The structure of the zones is shown on the top-down view to the left.
- These zones typically capture partially overlapping regions in 3D.

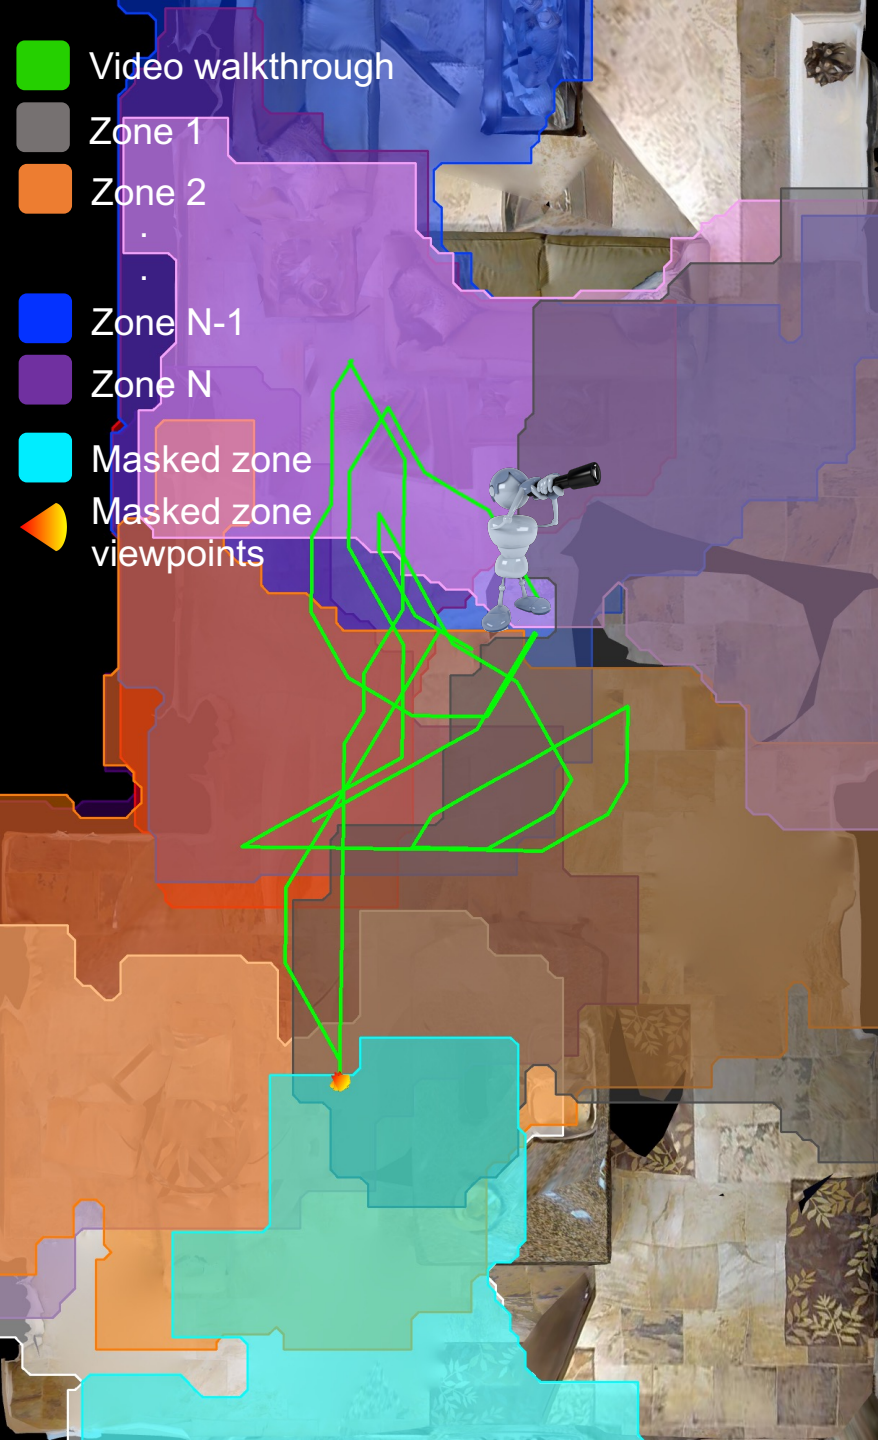

## Masked-zone prediction - Step 2: zone masking

Masked zone

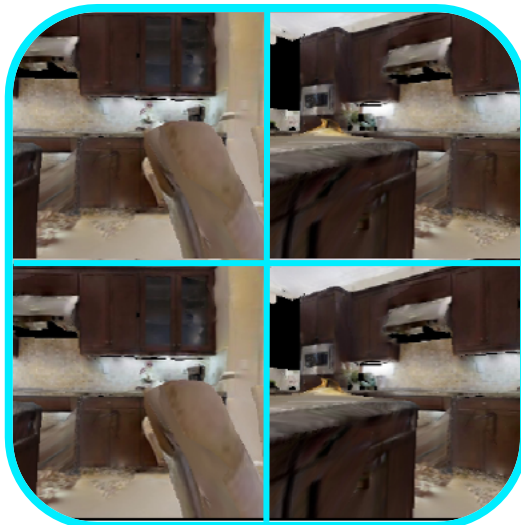

- Next, we mask out one or more zones from the left.
- The **viewpoints** belonging to a **masked zone** are shown on the left.
- Some **images** sampled from the masked zone are shown above.
- This zone contains a *part of a kitchen*.



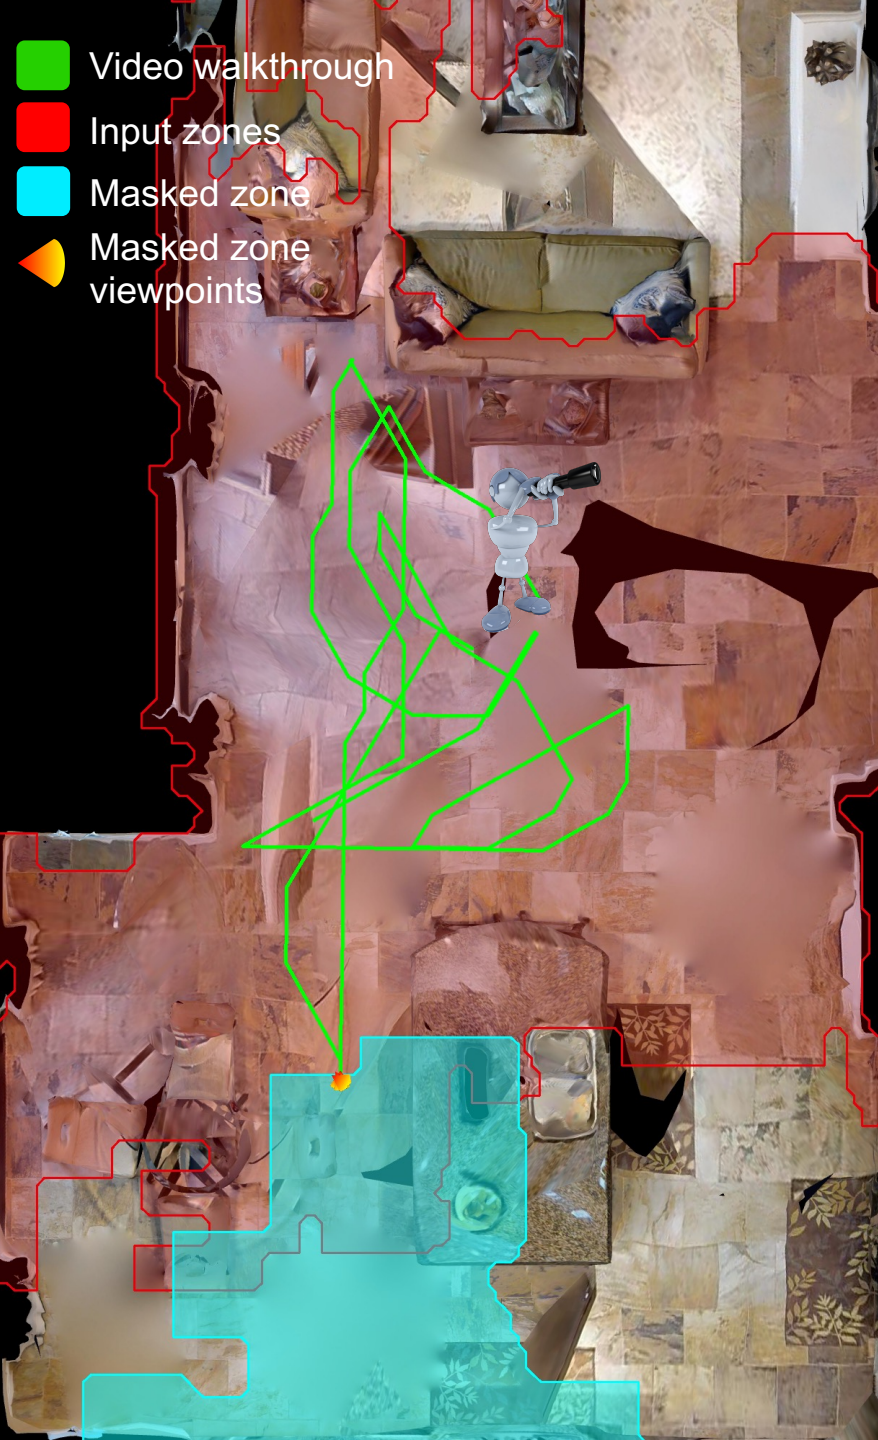

## Masked-zone prediction - Step 2: zone masking

Masked zone

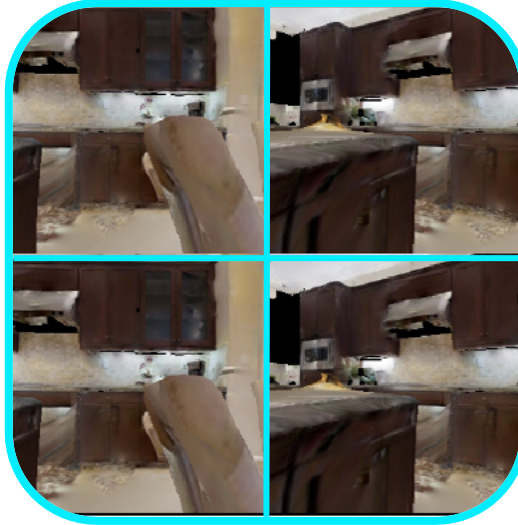

- The sensor readings from the *remaining zones* serve as inputs to the prediction model.



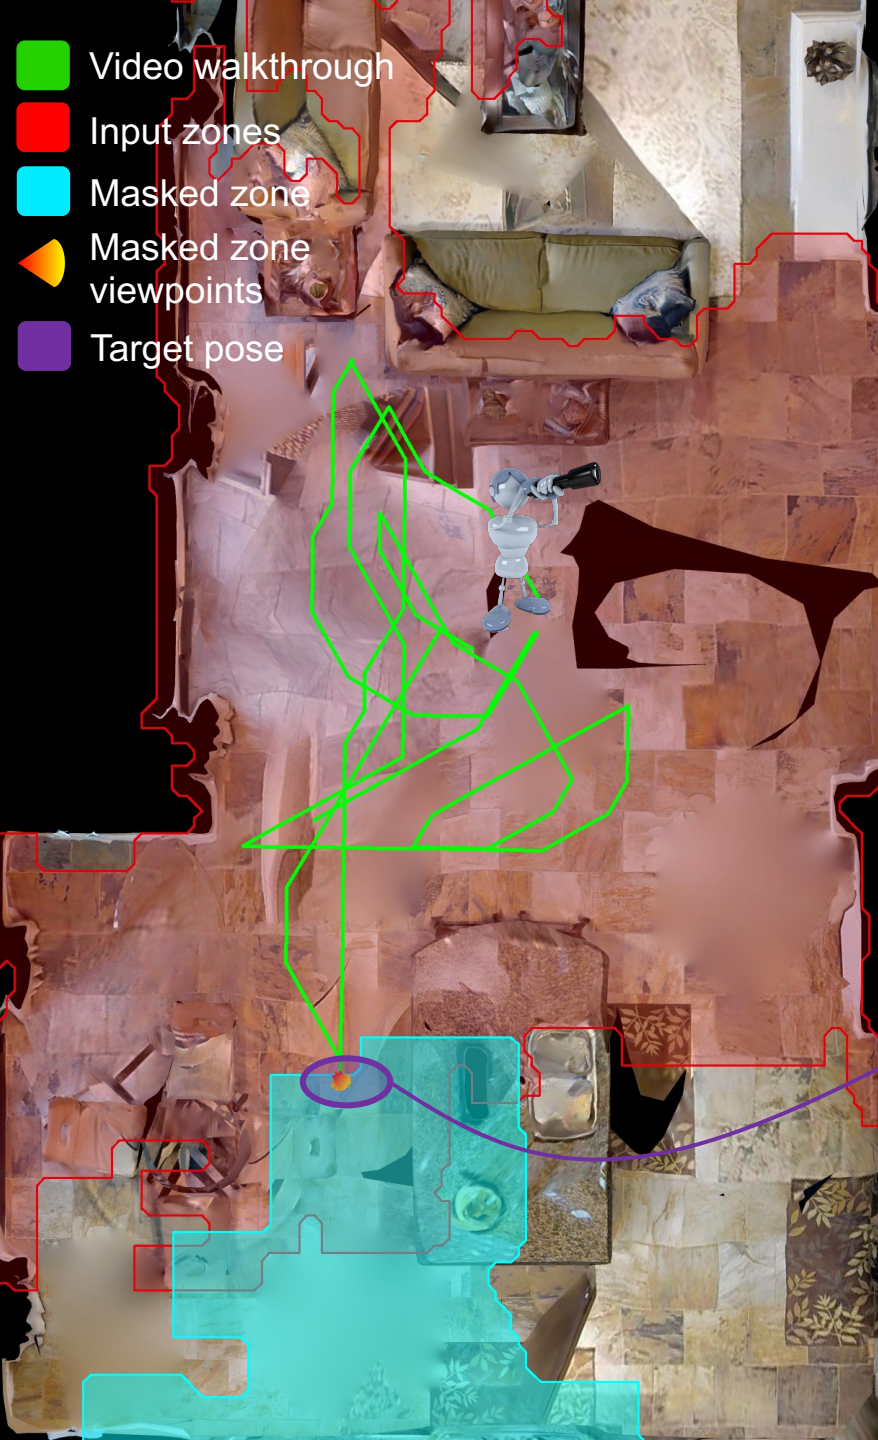

## Masked-zone prediction - Step 3: training task

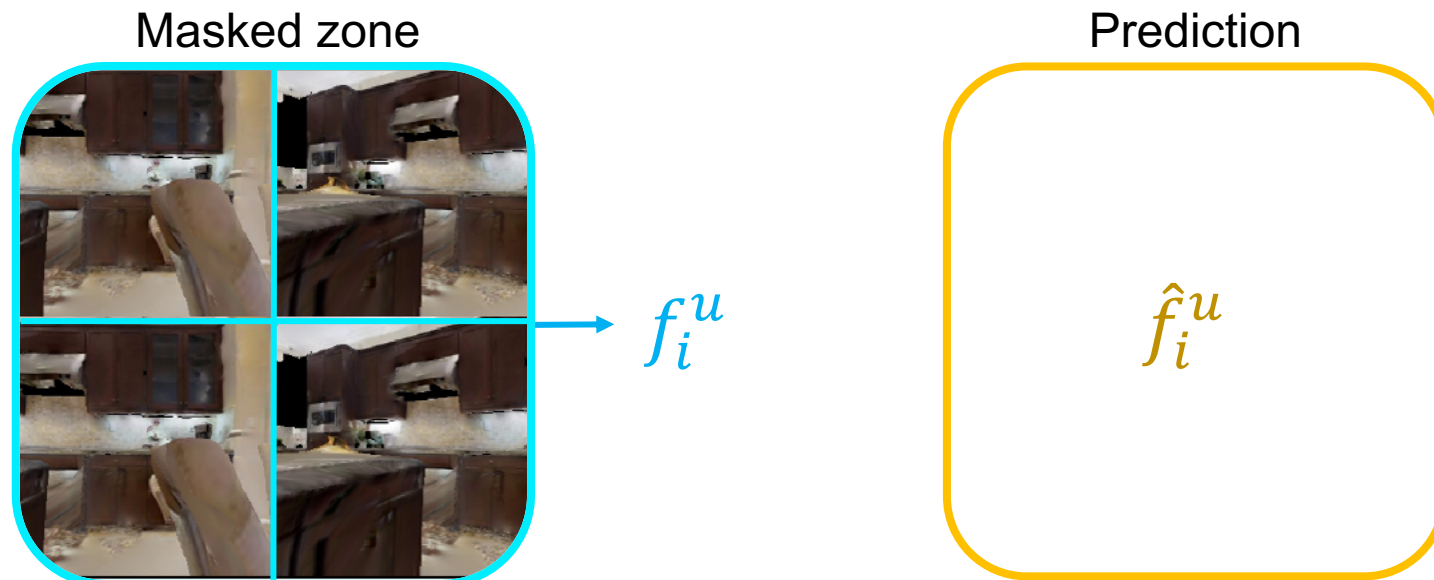

- Inputs: frames + camera poses from **input zones**
- Query: *mean* **target pose** from **masked zone**
- Output: predicted zone feature  $\hat{f}_i^u$





## Masked-zone prediction - Step 3: training task

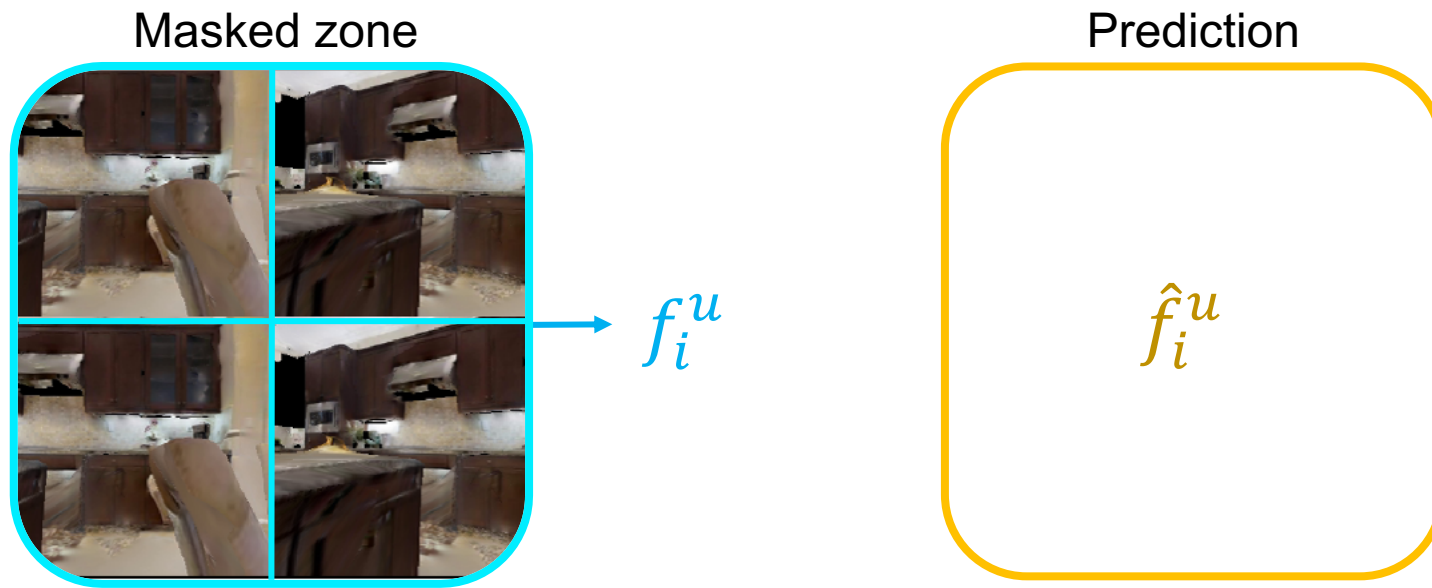

- Inputs: frames + camera poses from **input zones**
- Query: a **target pose** from **masked zone**
- Output: predicted visual feature  $\hat{f}_i^u$
- Contrastive loss function:

$$L_i = -\log \frac{\text{sim}(\hat{f}_i^u, f_i^u)}{\text{sim}(\hat{f}_i^u, f_i^u) + \sum_{i \neq j} \text{sim}(\hat{f}_i^u, f_j^u) + \sum \text{sim}(\hat{f}_i^u, f_k^u)}$$

Positive zone feature

Negative zones from same video

Negative zones from other videos



Next, we visualize the predictions made by our model  
on the masked-zone prediction task.

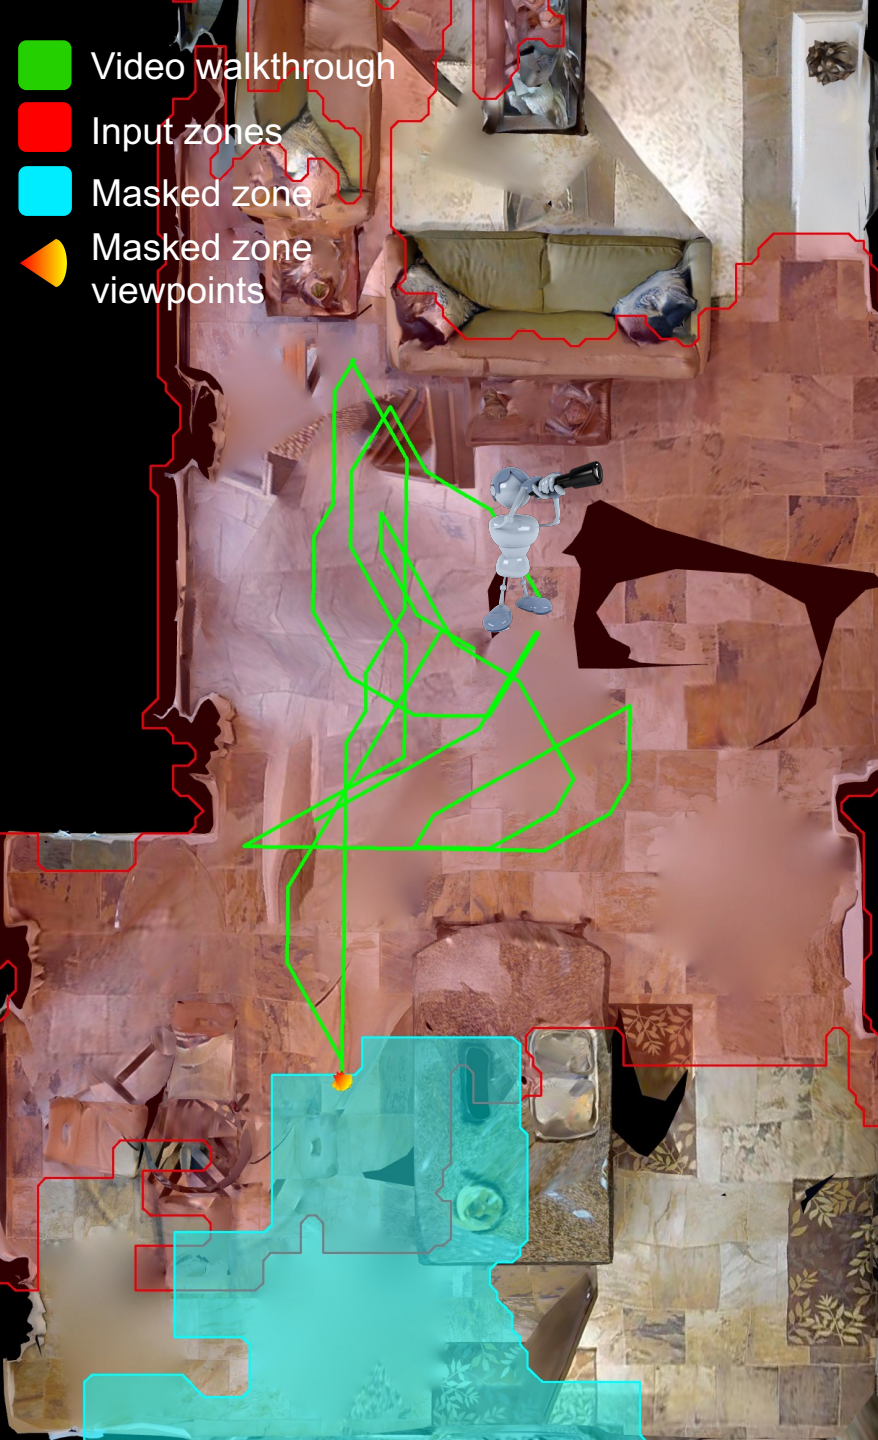

## Masked-zone prediction - Visualization

Masked zone

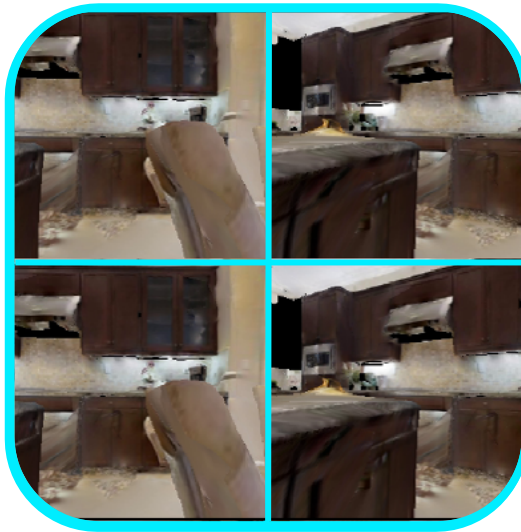

Retrieved zones

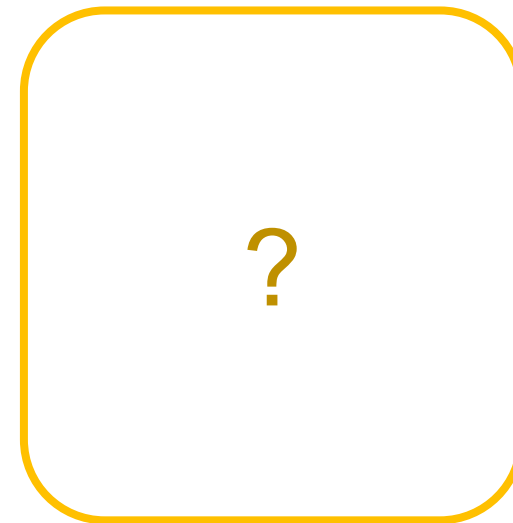

- We visualize the zone prediction  $\hat{f}_i^u$  using *inter-video retrieval*.
- We compare the prediction with the ground-truth  $f_i^u$  and zones  $\{f'_k\}_k$  sampled from other scenes.
- We then visualize the top-4 similar zones from  $[f_i^u, f'_{k_1}, f'_{k_2}, \dots]$ .





## Masked-zone prediction - Example

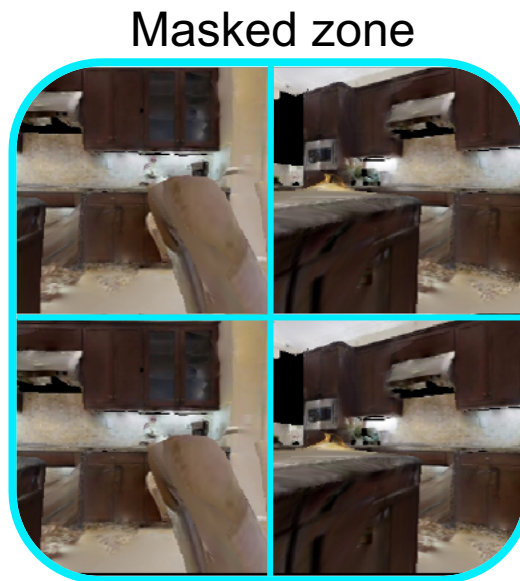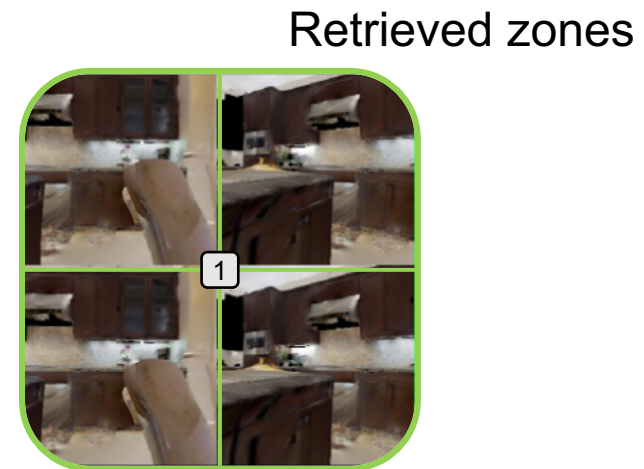

- The model accurately retrieves the **ground-truth masked zone** at the top.





## Masked-zone prediction - Example

Masked zone

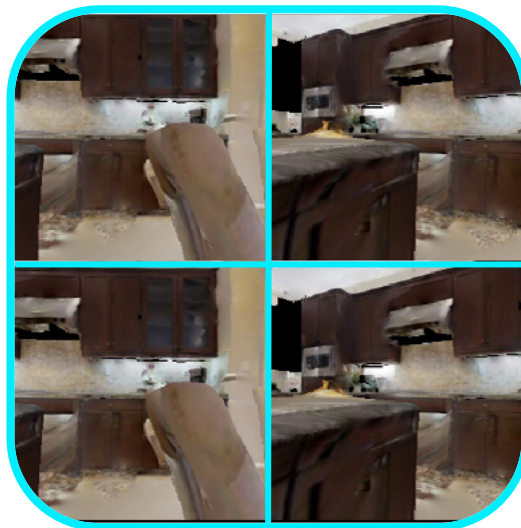

Retrieved zones

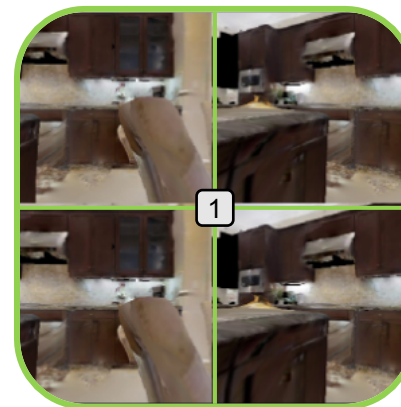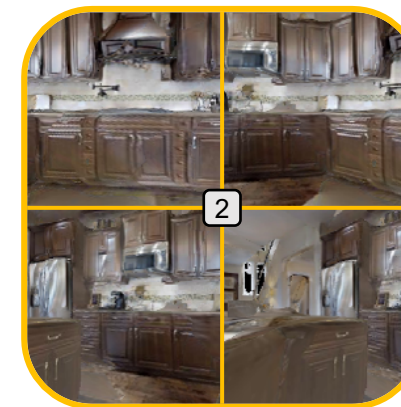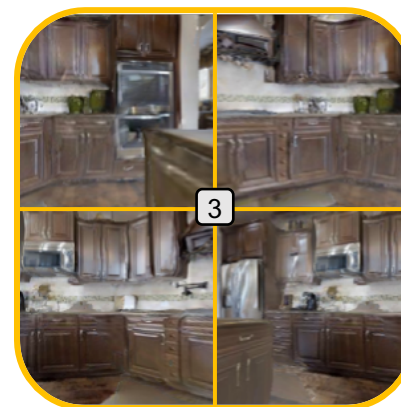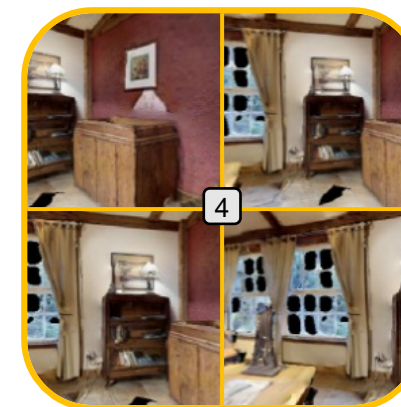

- The next two **retrieved zones** from other scenes also correspond to kitchens. This suggests that our learned feature representation captures general semantic concepts.
